# Supplementary material
Source: Springer Nature journal article supplement (https://www.springermedizin.de/resource/supplementary/13054_2012_619_MOESM5_ESM.pdf/9708790)

ONSD for the detection of ICP>20mmHg  
All measurements

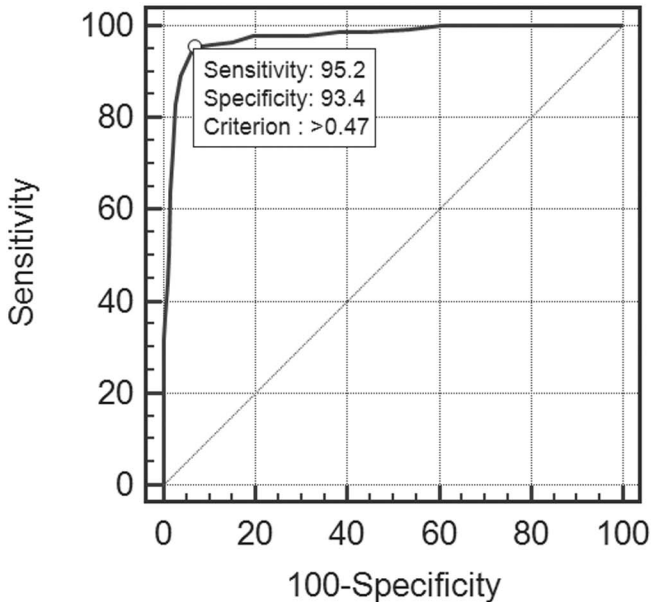

Supplement: MOESM5 [file 9708790]
